# Supplementary material for: Outcomes of Patients With Atrial Fibrillation Following Thrombectomy for Stroke: A Systematic Review and Meta-analysis
Source: PubMed Central journal article supplement (PMC9857225; doi:10.1001/jamanetworkopen.2022.49993), 2023-01-06
Supplement: jamanetwopen-e2249993-s001.pdf [file jamanetwopen-e2249993-s001.pdf]

## Supplemental Online Content

Kobeissi H, Ghozy S, Seymour T, et al. Outcomes of patients with atrial fibrillation following thrombectomy for stroke: a systematic review and meta-analysis. *JAMA Netw Open*. 2023;6(1):e2249993. doi:10.1001/jamanetworkopen.2022.49993

**eFigure 1.** Flowchart Detailing the Literature Review Process

**eFigure 2.** Forest Plot of Odds of IV Thrombolysis

**eFigure 3.** Forest Plot of Differences in Age

**eFigure 4.** Forest Plot of Odds of Diabetes

**eFigure 5.** Forest Plot of Odds of Hypertension

**eFigure 6.** Forest Plot of Odds of Coronary Artery Disease

**eFigure 7.** Forest Plot of Odds of Smoking

**eFigure 8.** Forest Plot of Odds of Male Sex

**eFigure 9.** Funnel Plot for 90-Day mRS 0-2 Analysis

**eFigure 10.** Influence Diagnostics to Identify Outlier Studies in 90-Day mRS 0-2 Analysis

**eFigure 11.** Influence Analysis to Identify Outlier Studies in TICI 2b-3 Analysis

**eFigure 12.** Funnel Plot for Mortality Analysis

**eAppendix.** Search Strategy

**eTable.** Detailed Risk of Bias Analysis

This supplemental material has been provided by the authors to give readers additional information about their work.

**eFigure 1. Flowchart Detailing the Literature Review Process**

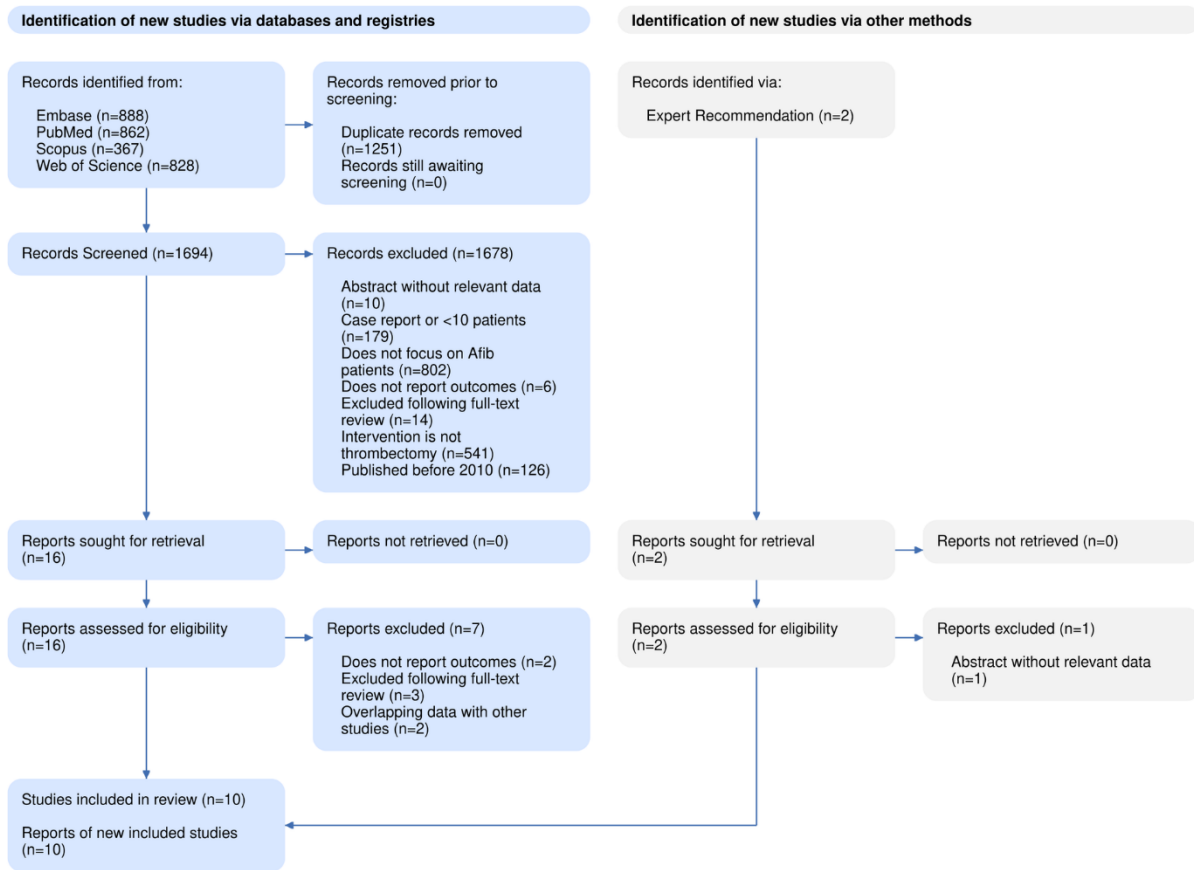

**eFigure 2.** Forest Plot of Odds of IV Thrombolysis

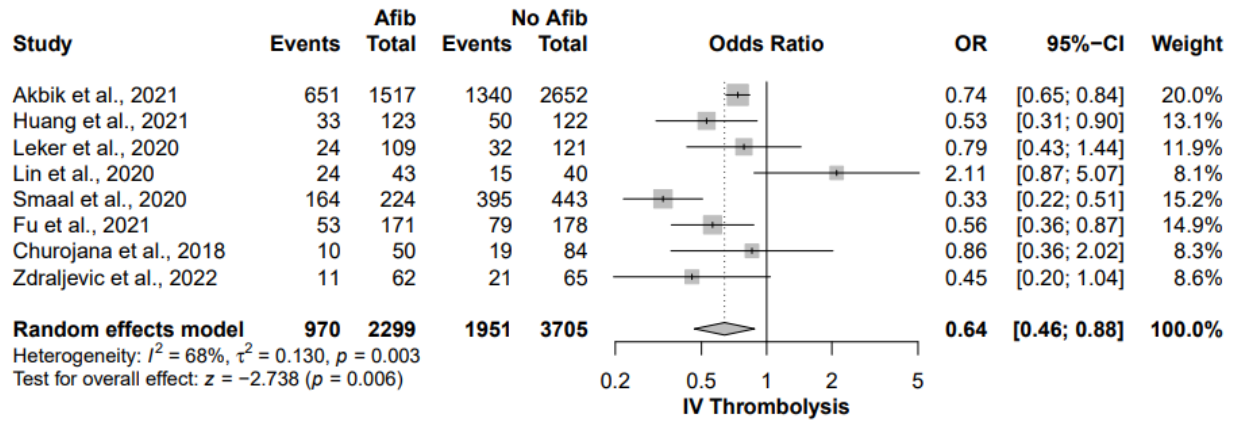

**eFigure 3.** Forest Plot of Differences in Age

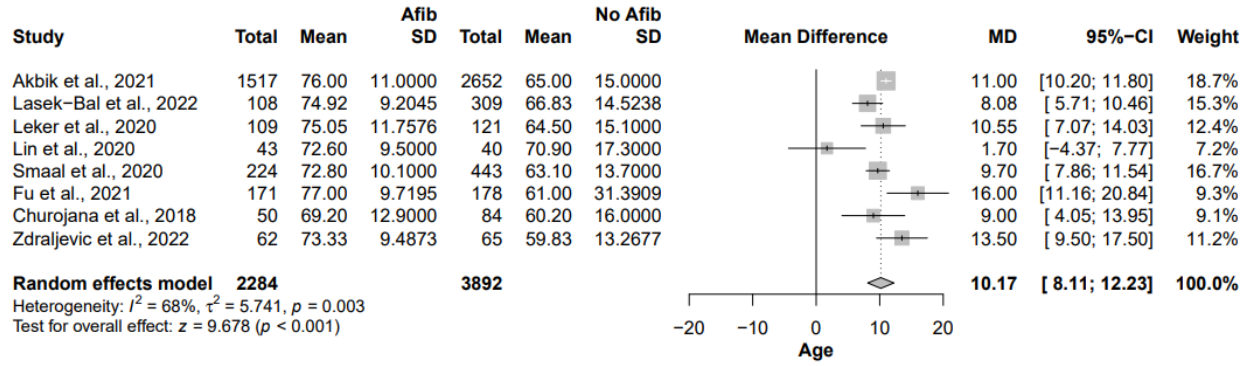

**eFigure 4.** Forest Plot of Odds of Diabetes

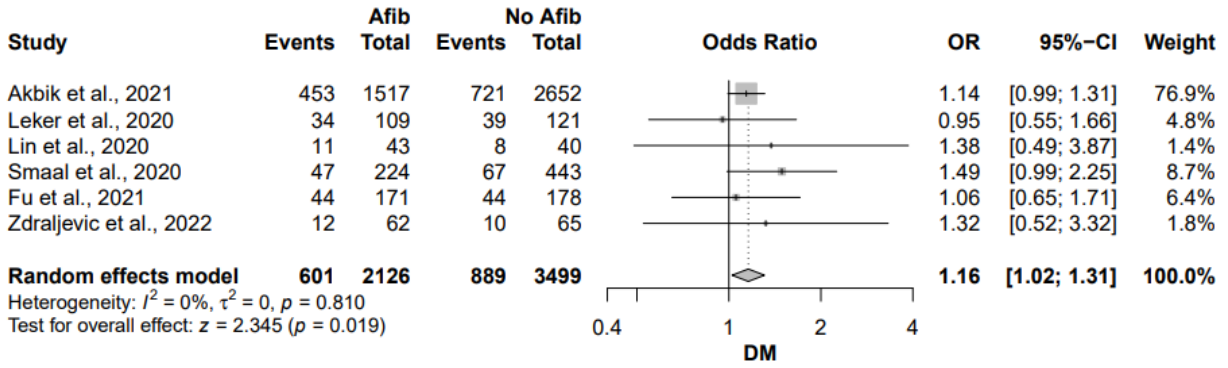

**eFigure 5.** Forest Plot of Odds of Hypertension

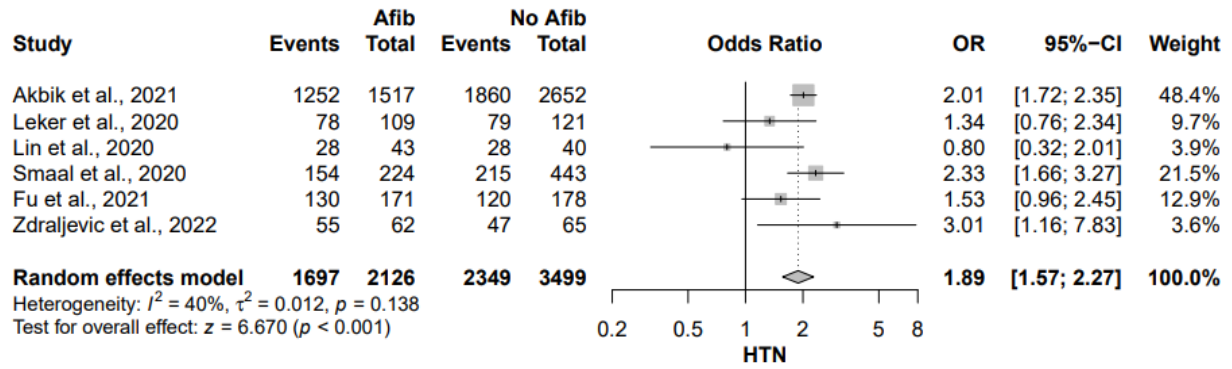

**eFigure 6.** Forest Plot of Odds of Coronary Artery Disease

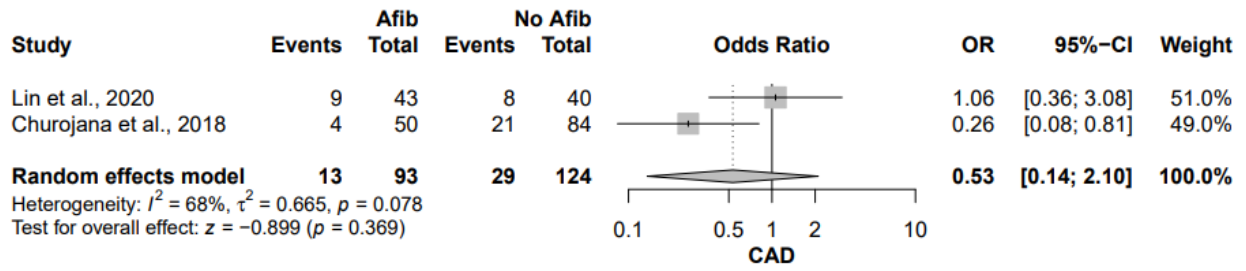

**eFigure 7.** Forest Plot of Odds of Smoking

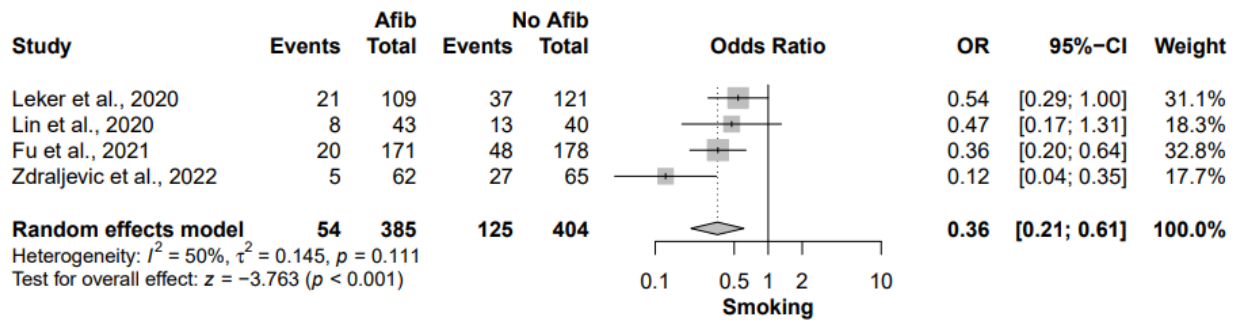



**eFigure 8.** Forest Plot of Odds of Male Sex

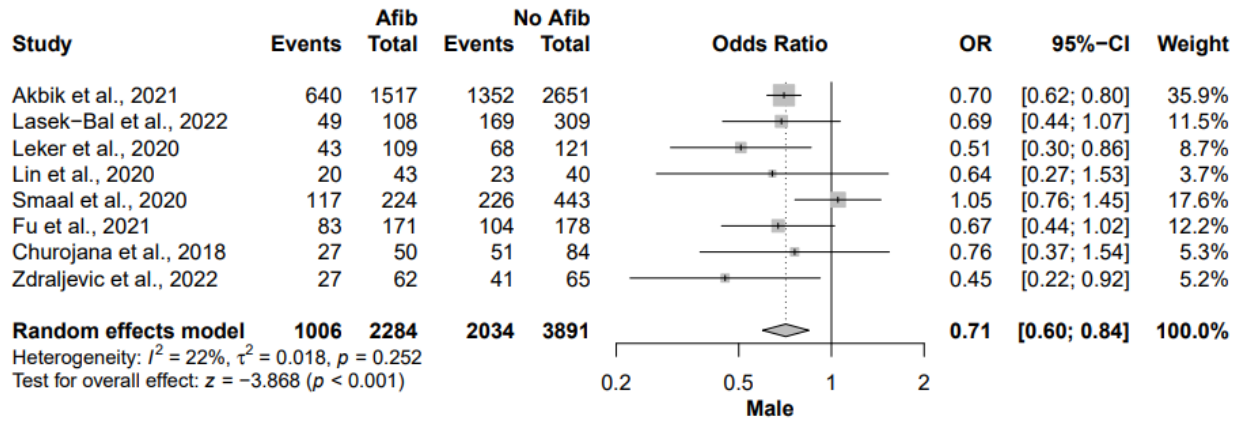

**eFigure 9.** Funnel Plot for 90-Day mRS 0-2 Analysis

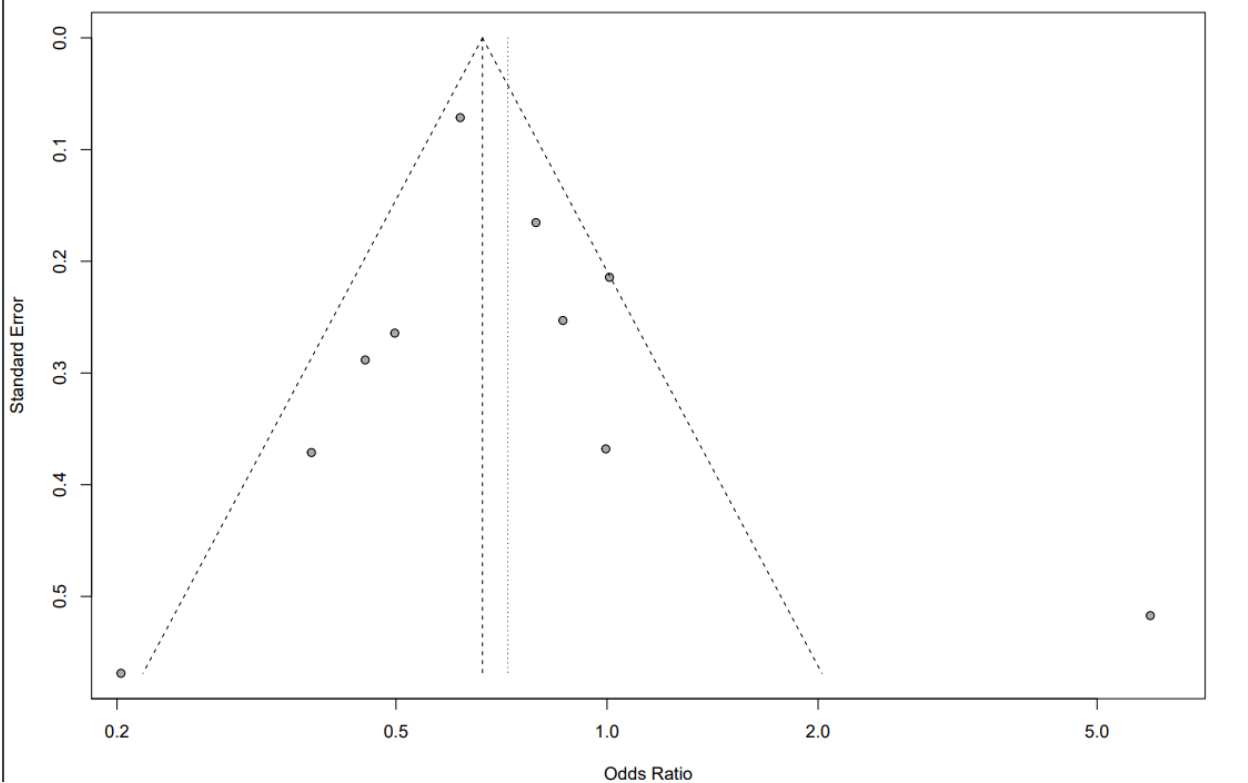

**eFigure 10.** Influence Diagnostics to Identify Outlier Studies in 90-Day mRS 0-2 Analysis

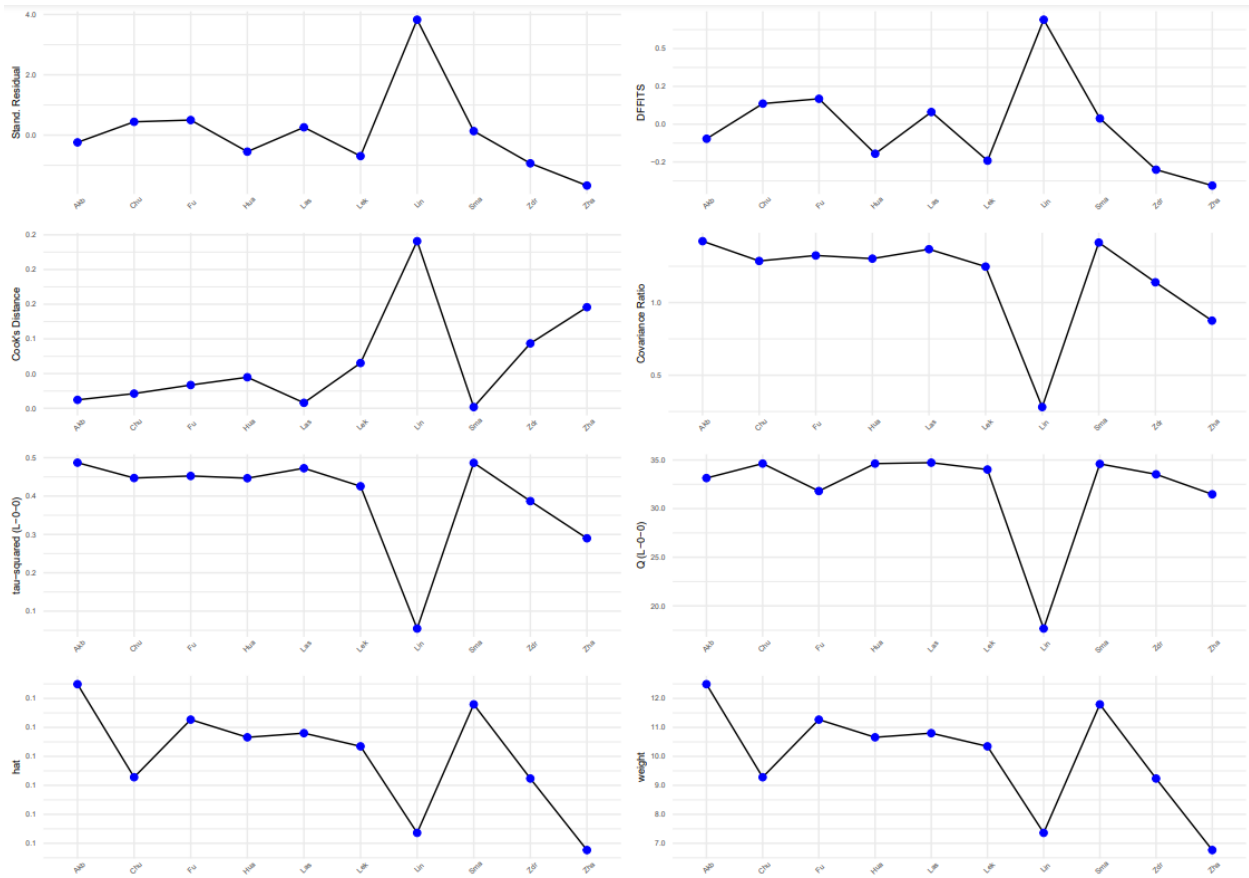

**eFigure 11.** Influence Analysis to Identify Outlier Studies in TICI 2b-3 Analysis

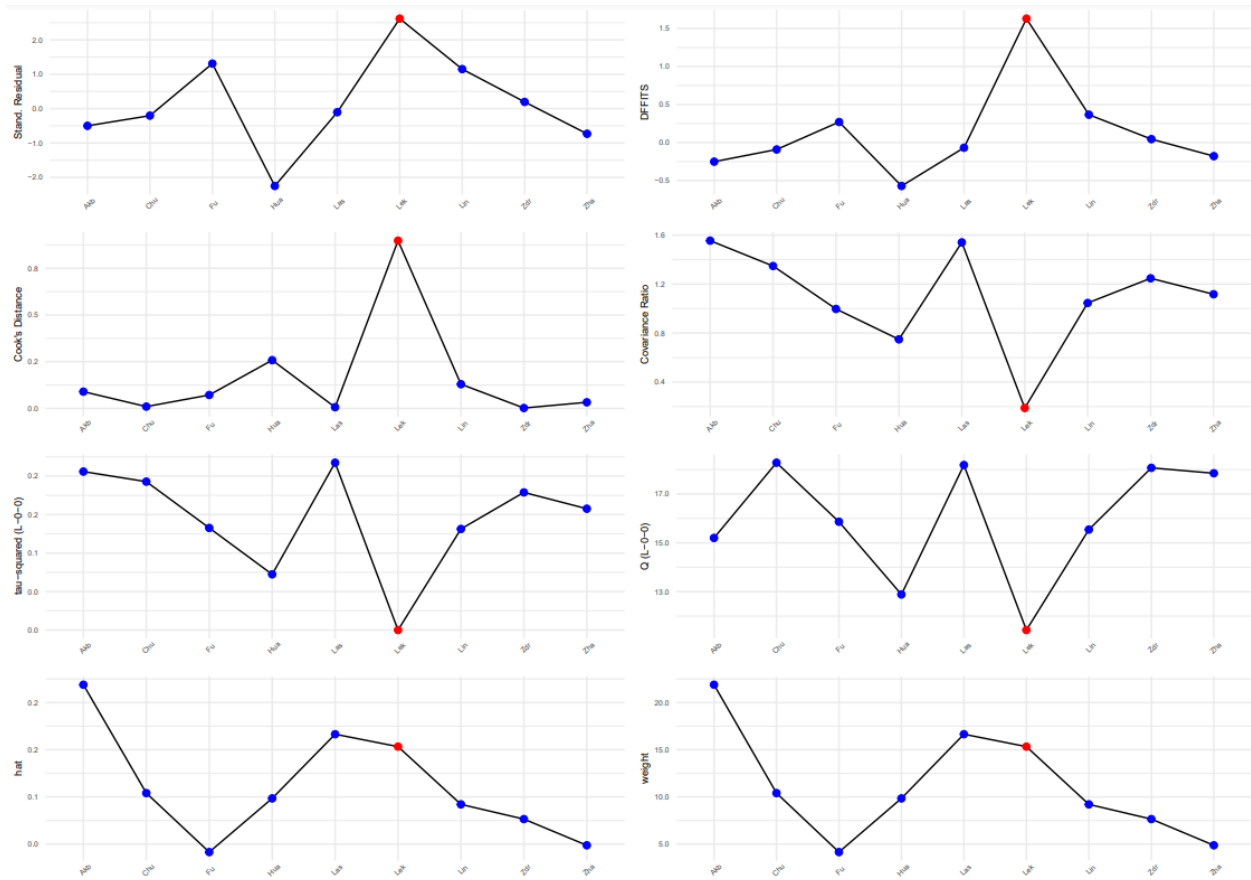

**eFigure 12.** Funnel Plot for Mortality Analysis

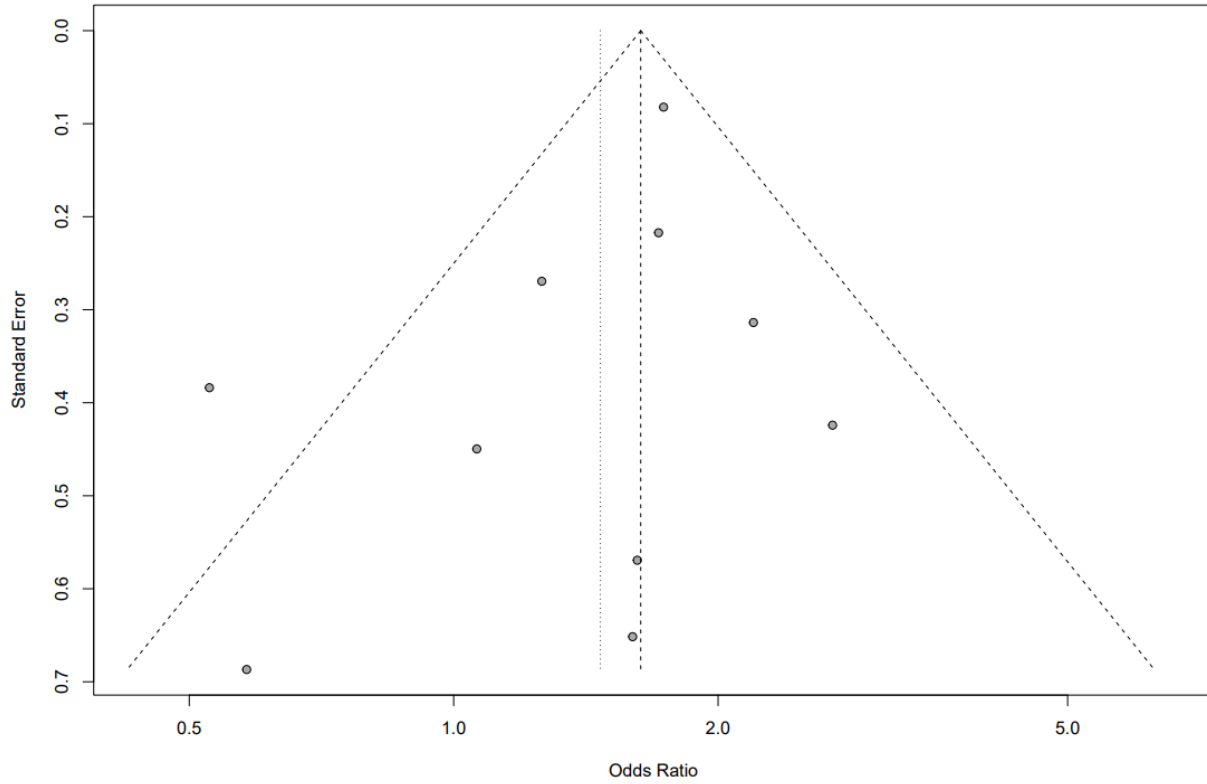

## eAppendix. Search Strategy

**Web of Science:** ((TS=(((("stroke" OR "stroke") OR "strokes") OR "stroke s") OR (((("cerebral infarction" OR ("cerebral" AND "infarction")) OR "cerebral infarction") OR ("cerebral" AND "infarct")) OR "cerebral infarct")) OR (((((((("infarctation" OR "infarcted") OR "infarctic") OR "infarcting") OR "infarction") OR "infarction") OR "infarct") OR "infarctions") OR "infarcts") OR "infarctive")) AND TS=(((("thrombectomy" OR "thrombectomy") OR "thrombectomies") OR (((("mechanical" OR "mechanically") OR "mechanicals") OR "mechanics") OR "mechanics") OR "mechanic") AND ((("thrombectomy" OR "thrombectomy") OR "thrombectomies")) OR ("endovascular" AND (((("therapeutics" OR "therapeutics") OR "therapies") OR "therapy") OR "therapy") OR "therapy s") OR "therapys")))) AND TS=(("Atrial Fibrillation" OR "AF" OR "AFib"))

**Embase:** Embase <1974 to 2022 July 13> 1 ("stroke" or "stroke" or "strokes" or "stroke s" or ("cerebral infarction" or ("cerebral" and "infarction") or "cerebral infarction" or ("cerebral" and "infarct") or "cerebral infarct") or ("infarctation" or "infarcted" or "infarctic" or "infarcting" or "infarction" or "infarction" or "infarct" or "infarctions" or "infarcts" or "infarctive")).ab,ti. 798870 2 ("thrombectomy" or "thrombectomy" or "thrombectomies" or (("mechanical" or "mechanically" or "mechanicals" or "mechanics" or "mechanics" or "mechanic") and ("thrombectomy" or "thrombectomy" or "thrombectomies")) or ("endovascular" and ("therapeutics" or "therapeutics" or "therapies" or "therapy" or "therapy" or "therapy s" or "therapys"))).ab,ti. 41213 3 ("Atrial Fibrillation" or "AF" or "AFib").ab,ti. 175490 4 1 and 2 and 3 911

**Scopus:** TITLE-ABS ( ( ( ( ( "stroke" OR "stroke" ) OR "strokes" ) OR "stroke s" ) OR ( ( ( "cerebral infarction" OR ( "cerebral" AND "infarction" ) ) OR "cerebral infarction" ) OR ( "cerebral" AND "infarct" ) ) OR "cerebral infarct" ) ) OR ( ( ( ( ( ( ( "infarctation" OR "infarcted" ) OR "infarctic" ) OR "infarcting" ) OR "infarction" ) OR "infarction" ) OR "infarct" ) OR "infarctions" ) OR "infarcts" ) OR "infarctive" ) AND ( ( ( "thrombectomy" OR "thrombectomy" ) OR "thrombectomies" ) OR ( ( ( ( ( "mechanical" OR "mechanically" ) OR "mechanicals" ) OR "mechanics" ) OR "mechanics" ) OR "mechanic" ) AND ( ( "thrombectomy" OR "thrombectomy" ) OR "thrombectomies" ) ) ) OR ( "endovascular" AND ( ( ( ( ( "therapeutics" OR "therapeutics" ) OR "therapies" ) OR "therapy" ) OR "therapy" ) OR "therapy s" ) OR "therapys" ) ) AND ( "Atrial Fibrillation" OR "AF" OR "AFib" ) )

**PubMed:** (((("stroke"[MeSH Terms] OR "stroke"[All Fields]) OR "strokes"[All Fields]) OR "stroke s"[All Fields]) OR (((("cerebral infarction"[MeSH Terms] OR ("cerebral"[All Fields] AND "infarction"[All Fields])) OR "cerebral infarction"[All Fields]) OR ("cerebral"[All Fields] AND "infarct"[All Fields])) OR "cerebral infarct"[All Fields])) OR (((((((("infarctation"[All Fields] OR "infarcted"[All Fields]) OR "infarctic"[All Fields]) OR "infarcting"[All Fields]) OR "infarction"[MeSH Terms] OR "infarction"[All Fields]) OR "infarct"[All Fields]) OR "infarctions"[All Fields]) OR "infarcts"[All Fields]) OR "infarctive"[All Fields]) AND (((("thrombectomy"[MeSH Terms] OR "thrombectomy"[All Fields]) OR "thrombectomies"[All Fields]) OR (((("mechanical"[All Fields] OR "mechanically"[All Fields]) OR "mechanicals"[All Fields]) OR "mechanics"[MeSH Terms]) OR "mechanics"[All Fields]) OR

"mechanic"[All Fields] AND (("thrombectomy"[MeSH Terms] OR "thrombectomy"[All Fields] OR "thrombectomies"[All Fields])) OR ("endovascular"[All Fields] AND (((("therapeutics"[MeSH Terms] OR "therapeutics"[All Fields]) OR "therapies"[All Fields]) OR "therapy"[MeSH Subheading] OR "therapy"[All Fields] OR "therapy s"[All Fields] OR "therapys"[All Fields])) AND ("Atrial Fibrillation" OR "AF" OR "AFib"))

**eTable.** Detailed Risk of Bias Analysis

|       |            |            |                                          | New Castle Ottawa scale assessment (NOS) |                           |                                                                          |                                                                 |                       |                                                 |                                  |   |               |
|-------|------------|------------|------------------------------------------|------------------------------------------|---------------------------|--------------------------------------------------------------------------|-----------------------------------------------------------------|-----------------------|-------------------------------------------------|----------------------------------|---|---------------|
|       |            |            |                                          | Selection                                |                           |                                                                          |                                                                 | Comparability         | Outcome                                         |                                  |   | Quality Score |
| Study | Year       | Sample (n) | Representativeness of the exposed cohort | Selection of the non exposed cohort      | Ascertainment of exposure | Demonstration that outcome of interest was not present at start of study | Comparability of cohorts on the basis of the design or analysis | Assessment of outcome | Was follow-up long enough for outcomes to occur | Adequacy of follow up of cohorts |   |               |
| 1     | Akbik      | 2021       | 4,169                                    | *                                        | *                         | *                                                                        |                                                                 | *                     | *                                               | *                                | * | Good          |
| 2     | Ždraljević | 2022       | 127                                      | *                                        | *                         | *                                                                        |                                                                 | *                     | *                                               | *                                | * | Good          |
| 3     | Huang      | 2021       | 245                                      | *                                        | *                         | *                                                                        |                                                                 | *                     | *                                               | *                                | * | Good          |
| 4     | Lasek-Bal  | 2022       | 417                                      | *                                        | *                         | *                                                                        |                                                                 | *                     | *                                               | *                                | * | Good          |
| 5     | Leker      | 2020       | 230                                      | *                                        | *                         | *                                                                        |                                                                 | *                     | *                                               | *                                | * | Good          |
| 6     | Lin        | 2020       | 83                                       |                                          | *                         | *                                                                        |                                                                 | *                     | *                                               | *                                | * | Fair          |
| 7     | Smaal      | 2020       | 666                                      | *                                        | *                         | *                                                                        |                                                                 | *                     | *                                               | *                                | * | Good          |
| 8     | Fu         | 2021       | 394                                      | *                                        | *                         | *                                                                        |                                                                 | *                     | *                                               | *                                | * | Good          |
| 9     | Churojana  | 2018       | 134                                      | *                                        | *                         | *                                                                        |                                                                 | *                     | *                                               | *                                | * | Good          |
| 10    | Zhang      | 2019       | 78                                       |                                          | *                         | *                                                                        |                                                                 | *                     | *                                               | *                                | * | Fair          |
