# Supplementary material for: Outcomes of Patients With Atrial Fibrillation Following Thrombectomy for Stroke: A Systematic Review and Meta-analysis
Source: PubMed Central journal article supplement (PMC9857225; doi:10.1001/jamanetworkopen.2022.49993), 2023-01-06
Supplement: jamanetwopen-e2249993-s002.pdf [file jamanetwopen-e2249993-s002.pdf]

## Data Sharing Statement

Kobeissi. Outcomes of Patients With Atrial Fibrillation Following Thrombectomy for Stroke. *JAMA Netw Open*. Published January 06, 2023. doi:10.1001/jamanetworkopen.2022.49993

### Data

**Data available:** No

### Additional Information

**Explanation for why data not available:** The data that support this study comes from publicly available papers, which are cited in our systematic review and meta-analysis.
